# Supplementary material for: Functional Evaluation of Splicing for Variants of Uncertain Significance in Patients with Inherited Retinal Diseases
Source: MDPI journal article supplement (doi:10.3390/genes12070993), 2021-06-29
Supplement: s1 [file s1]

**Table S1.** Constructs for minigene assays

| Gene          | Transcript Accession Number | Nucleotide Variant (location)                 | Primers                                              | Exons in construct | Genomic fragment size in bp |
|---------------|-----------------------------|-----------------------------------------------|------------------------------------------------------|--------------------|-----------------------------|
| <b>OPA1</b>   | NM_130837.2                 | c.2797G>T (exon 28)                           | F: GCAGAATTTTCATGGCTCCGT<br>R: GGAGTCCATTCCCAACAGAG  | Exon 28            | 801                         |
| <b>CNGB1</b>  | NM_001297.4                 | c.2492+1G>A (intron 25)                       | F: ATCCGATGCCCCTCATTGTG<br>R: GCAGGTGCTCAGGAAACCTT   | Exon 25            | 1187                        |
|               |                             | c.583+2T>C (intron 9)                         | F: CCTGGGAACATGGTGCTTCT<br>R: GCTCCTGTCAGGTGTGTGTT   | Exons 8-10         | 1820                        |
|               |                             | c.2305-34G>A (intron 23)                      | F: GTGGGAGTGTCTCCAAACC<br>R: AGGTCAGTGGGGGTAGACAA    | Exons 23-24        | 3489                        |
| <b>CLUAP1</b> | NM_015041.3                 | c.929-142G>A (intron 9)<br>C.930T>A (exon 10) | F: GGCGAGAGAGAGCAAGAG<br>R: GCTTTGTTGCTTGAATCTTTTGTG | Exon 10            | 972                         |

**Table S2.** In silico analysis of the identified variants altering Non-Canonical Splice Sites (NCSS), Gene, Location and Minimum Allele Frequency (MAF) of each variant is indicated. Relevant changes are highlighted in red.

| Gene                                                                                                         | Variant                    | SSF      |           |          |           | MaxEntScan |           |          |           | NNSPLICE |           |          |           | GeneSplicer |           |          |           | EX-SKIP<br>ESS/ESE |      | EX-SKIP                                         | Align GVD<br>(v2007)        | SIFT (v6.2.0)                           | MutationTaster<br>(v2013) |
|--------------------------------------------------------------------------------------------------------------|----------------------------|----------|-----------|----------|-----------|------------|-----------|----------|-----------|----------|-----------|----------|-----------|-------------|-----------|----------|-----------|--------------------|------|-------------------------------------------------|-----------------------------|-----------------------------------------|---------------------------|
|                                                                                                              |                            | WT<br>5' | MUT<br>5' | WT<br>3' | MUT<br>3' | WT<br>5'   | MUT<br>5' | WT<br>3' | MUT<br>3' | WT<br>5' | MUT<br>5' | WT<br>3' | MUT<br>3' | WT<br>5'    | MUT<br>5' | WT<br>3' | MUT<br>3' | WT                 | MUT  |                                                 |                             |                                         |                           |
| <i>OPA1</i>                                                                                                  | c.2797G>T<br>(p.Val933Phe) | NR       | NR        | 79       | 78.9      | NR         | NR        | 5.3      | 5.34      | NR       | NR        | 1        | 0.57      | NR          | NR        | 1        | 1.1       | 1.9                | 2.44 | MUT allele has higher chance of exon skipping   | C0 (GV: 353.86 - GD: 0.00)  | Deleterious (score: 0.01, median: 3.33) | disease causing (prob: 1) |
| <i>CNGB1</i>                                                                                                 | c.2492+1G>A                | 90       | NR        | NR       | NR        | 9.6        | NR        | 3        | 1.8       | 1        | NR        | NR       | NR        | 7.4         | NR        | NR       | NR        | NA                 | NA   | NA                                              | NA                          | NA                                      | NA                        |
|                                                                                                              | c.2305-34G>A               | 71       | NR        | NR       | 70.2      | 6.2        | NR        | NR       | 1         | NR       | NR        | NR       | NR        | 1.9         | NR        | NR       | NR        | NA                 | NA   | NA                                              | NA                          | NA                                      | NA                        |
|                                                                                                              | c.583+2T>C                 | 72       | NR        | NR       | NR        | 8.7        | NR        | NR       | NR        | 0.9      | NR        | NR       | NR        | 10          | NR        | NR       | NR        | NA                 | NA   | NA                                              | NA                          | NA                                      | NA                        |
| <i>CLUAP1</i>                                                                                                | c.930T>A<br>(p.Ser310Arg)  | 78       | NR        | 82       | 82.2      | 7.7        | NR        | 11       | 9.6       | 0.7      | NR        | 1        | 0.5       | NR          | NR        | 12       | 11        | 0                  | 0    | Both alleles have equal chance of exon skipping | C0 (GV: 250.76 - GD: 19.25) | Tolerated (score: 0.39, median: 3.58)   | disease causing (prob: 1) |
|                                                                                                              | c.929-142G>A               | NR       | NR        | NR       | 79.4      | NR         | NR        | NR       | 5.6       | NR       | NR        | NR       | NR        | NR          | NR        | NR       | NR        | NA                 | NA   | NA                                              | NA                          | NA                                      | NA                        |
| Not applicable (NA); SSF: splice site finder; WT: wild type; MUT: mutant; NR: not recognized; Cutoff SSF 70; |                            |          |           |          |           |            |           |          |           |          |           |          |           |             |           |          |           |                    |      |                                                 |                             |                                         |                           |
